# Supplementary material
Source: publisher figshare collection journal article supplement (https://karger.figshare.com/ndownloader/files/23147183)
Supplement: Supplementary file 1 [file 23147183]

| **Antibodies/Dyes** | **Company** | **Product #** | **Dilution** |
| --- | --- | --- | --- |
| Primary Antibodies |  |  |  |
| Pax6 | Biolegend | 901301 | 1:1000 |
| Tuj1 | Biolegend | 801202 | 1:10,000 |
| Tbr2 | Abcam | ab23345 | 1:500 |
| NeuroD2 | Abcam | ab104430 | 1:500 |
| pH2AX (Ser139) | Millipore | 05-636 | 1:100 |
| pATR | Cell Signaling | 2853 | 1:100 |
| pATM | Cell Signaling | 4526 | 1:100 |
| pChk1 | Cell Signaling | 2341 | 1:1000 |
| Sox2 | Thermo Fisher | 14-9811-80 | 1:500 |
| CC3 | Cell Signaling | 9661 | 1:1000 |
| P53 | Leica | CM5 | 1:500 |
| Phospho Histone H3 | Millipore | 06-570 | 1:1000 |
| Bactin | Santa Cruz | sc-47778 | 1:400 |
| Chk1 | Cell Signaling | 2360 | 1:1000 |
| Secondary Antibodies |  |  |  |
| Alexa 488 | Thermo Fisher | A21208, A11001, A11034 | 1:500 |
| Alexa 568 | Thermo Fisher | A11036 | 1:500 |
| Alexa 594 | Thermo Fisher | A11037, A11032, A21029 | 1:500 |
| Alexa 647 | Thermo Fisher | A31571, A31573 | 1:500 |
| GαRb HRP | Thermo Fisher | A16110 | 1:5,000 |
| GαMs HRP | Thermo Fisher | A16078 | 1:5,000 |
| Flourescent Dyes |  |  |  |
| DAPI | Thermo Fisher | D1306 | 1μg/mL |
| Propidium Iodide | Thermo Fisher | P3566 | 1:1000 |
| CFSE (FlashTag) | Thermo Fisher | C34554 | 1mM |
